# Supplementary material for: GC Insights: “Sedimentary Rock!” – a web app that converts geological strata data into music
Source: Copernicus journal article supplement (doi:10.5194/gc-9-1-2026), 2026-01-06
Supplement: Supplementary file 1 [file gc-9-1-2026-supplement.pdf]

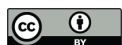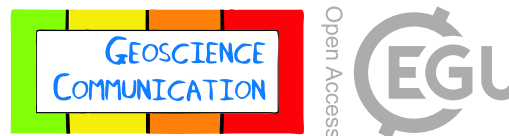

## *Supplement of*

# **GC Insights: “Sedimentary Rock!” – a web app that converts geological strata data into music**

**Toshiyuki Kitazawa et al.**

*Correspondence to:* Toshiyuki Kitazawa ([kitazawa@ris.ac.jp](mailto:kitazawa@ris.ac.jp))

The copyright of individual parts of the supplement might differ from the article licence.

Table S1. Questionnaire about the educational effects of Sedimentary Rock! (n=29)

| <b>Statements</b>                                                                                                                               | <b>Strongly Agree (%)</b> | <b>Agree (%)</b> | <b>Neutral (%)</b> | <b>Disagree (%)</b> | <b>Strongly Disagree (%)</b> |
|-------------------------------------------------------------------------------------------------------------------------------------------------|---------------------------|------------------|--------------------|---------------------|------------------------------|
| Working to create a columnar section deepens your understanding that the strata consist of concepts of grain size and thickness of the stratum. | 76                        | 21               | 3                  | 0                   | 0                            |
| The melody of the music deepens your understanding that the stacks of strata represent the geological history.                                  | 41                        | 34               | 10                 | 14                  | 0                            |
| Changes in the melody deepen your understanding that grain size and thickness changes indicate environmental changes.                           | 48                        | 31               | 10                 | 10                  | 0                            |
| Adding hearing and rhythmic senses, as well as visual senses such as outcrop pictures or columnar sections, is useful to understand strata.     | 45                        | 41               | 7                  | 7                   | 0                            |
